# Supplementary material for: The linkages of plant, litter and soil C:N:P stoichiometry and nutrient stock in different secondary mixed forest types in the Qinling Mountains, China
Source: PeerJ. 2020 Jun 3;8:e9274. doi: 10.7717/peerj.9274 (PMC7275688; doi:10.7717/peerj.9274)
Supplement: Supplemental Information 5 [file peerj-08-9274-s005.xlsx]

## Sheet: Species
Note :	BM: broadleaf mixed forests, BCM: broadleaf-conifer mixed forests, CM: coniferous mixed forests, DBH: diameter at breast height, H: tree height
Tree
BM-1						BM-2						BM-3
No.		Tree species	DBH (cm)	H (m)		No.		Tree species	DBH (cm)	H (m)		No.		Tree species	DBH (cm)	H (m)
1		Picea asperata	7.5	7.4		1		Quercus variabilis	22.2	9.5		1		Ouercus aliena var. auteserrata	50.3	14.6
2		Betula albosinensis	9.1	11.5		2		Quercus variabilis	34.2	12.7		2		Ouercus aliena var. auteserrata	18.1	12.6
3		Betula albosinensis	16.2	13.8		3		Betula albosinensis	43.4	16.2		3		Ouercus aliena var. auteserrata	25.3	13.4
4		Betula albosinensis	15.9	14		4		Betula albosinensis	44.4	15.7		4		Ouercus aliena var. auteserrata	15.6	8.9
5		Betula albosinensis	34.1	17.2		5		Betula albosinensis	21.2	13.5		5		Quercus variabilis	21	12.8
6		Betula albosinensis	33.2	15.4		6		Betula albosinensis	17.9	13.7		6		Quercus variabilis	11.6	8.5
7		Betula albosinensis	21.1	11.6		7	Other broad leaf species	Cerasus pseudocerasus	18.7	12.8		7		Pinus armandii	22.8	11
8		Betula albosinensis	20.4	13.1		8	Other broad leaf species	Cerasus pseudocerasus	12.2	7.5		8		Betula albosinensis	14.2	11.5
9		Betula albosinensis	24.4	15.5		9	Other broad leaf species	Carpinus turczaninowii	9.8	7.6		9		Betula albosinensis	8.7	11
10		Ouercus aliena var. auteserrata	7.2	7.7		10	Other broad leaf species	Corylus heterophylla	29.8	13		10		Betula albosinensis	35.4	15.3
11		Quercus variabilis	12.4	8.5		11	Other broad leaf species	Acer davidii	29.6	13		11		Betula albosinensis	14	13.1
12		Quercus variabilis	9.2	9.4		12	Other broad leaf species	Acer davidii	10.1	10.5		12		Betula albosinensis	18.5	10.4
13		Quercus variabilis	9.7	5.8		13	Other broad leaf species	Acer davidii	15.9	11		13		Betula albosinensis	13.1	9.5
14		Quercus variabilis	10.1	10.5		14	Other broad leaf species	Trib. Rhoideae	19.3	12		14		Betula albosinensis	9.1	8.7
15		Pinus armandii	37.6	17.6		15	Other broad leaf species	Acer davidii	21.3	11.5		15		Betula albosinensis	7.4	12.5
16		Pinus armandii	19.4	14.2		16	Other broad leaf species	Acer davidii	11.6	10		16		Betula albosinensis	18.4	14.8
17		Pinus armandii	10.6	8.3		17	Other broad leaf species	Juglans cathayensis	12.5	9.8		17	Other broad leaf species	Kalopanax	29.1	12.5
18		Pinus armandii	17.5	14.8		18	Other broad leaf species	Acer davidii	18.4	12.8		18	Other broad leaf species	Kalopanax	32.8	13.5
19		Pinus armandii	9.1	11.8		19	Other broad leaf species	Kalopanax	10	5.5		19	Other broad leaf species	Acer davidii	18.5	11.8
20		Pinus armandii	16.5	13.4		20	Other broad leaf species	Sorbus	8.3	5.8		20	Other broad leaf species	Cerasus pseudocerasus	12.7	8.5
21		Pinus armandii	12.6	12.7		21	Other broad leaf species	Sorbus	14.5	10.5		21	Other broad leaf species	Cerasus pseudocerasus	10.6	7.5
22	Other broad leaf species	Sorbus	7	11		22	Other broad leaf species	Sorbus	16.5	10		22	Other broad leaf species	Cerasus pseudocerasus	8.9	8
23	Other broad leaf species	Tilia tuan	12.6	8.5		23	Other broad leaf species	Carpinus turczaninowii	12.9	8.2		23	Other broad leaf species	Trib. Rhoideae	31.1	13.4
24	Other broad leaf species	Tilia tuan	9.5	11.5		24	Other broad leaf species	Cerasus pseudocerasus	10.1	8.5		24	Other broad leaf species	Sorbus	11.5	13
25	Other broad leaf species	Sorbus	11.2	7.2		25	Other broad leaf species	Cerasus pseudocerasus	9.5	6.7		25	Other broad leaf species	Sorbus	11.6	6.5
26	Other broad leaf species	Acer ginnala	6.8	6.8		26	Other broad leaf species	Cerasus pseudocerasus	9.5	8.9		26	Other broad leaf species	Sorbus	12.4	5.5
27	Other broad leaf species	Acer ginnala	7.1	7.2								27	Other broad leaf species	Cerasus pseudocerasus	16.8	10.8
28	Other broad leaf species	Corylus heterophylla	9.1	5.5								28	Other broad leaf species	Sorbus	35.3	13.5
29	Other broad leaf species	Sorbus	13.1	9.1								29	Other broad leaf species	Trib. Rhoideae	27.3	14.5
30	Other broad leaf species	Carpinus turczaninowii	14.5	12.7
31	Other broad leaf species	Salix cupularis	11.1	9.8
32	Other broad leaf species	Carpinus turczaninowii	20.4	13.9
33	Other broad leaf species	Carpinus turczaninowii	29.8	6.5
34	Other broad leaf species	Carpinus turczaninowii	20.8	10.4
35	Other broad leaf species	Acer ginnala	8.9	8.1
36	Other broad leaf species	Acer ginnala	7.9	8.2
37	Other broad leaf species	Acer ginnala	9.6	8.2
38	Other broad leaf species	Sorbus	8.5	7.8
39	Other broad leaf species	Sorbus	7.5	8.2
40	Other broad leaf species	Sorbus	8.4	9.2
41	Other broad leaf species	Sorbus	9.5	9.7
42	Other broad leaf species	Acer ginnala	17.2	11.2
43	Other broad leaf species	Acer ginnala	25.1	12.4
44	Other broad leaf species	Acer ginnala	12.1	12.8
45	Other broad leaf species	Sorbus hupehensis	11.1	15.1
46	Other broad leaf species	Acer ginnala	13.5	11
47	Other broad leaf species	Acer davidii	10.4	15
48	Other broad leaf species	Acer davidii	12.9	11.8
49	Other broad leaf species	Trib. Rhoideae	11.7	10.3
50	Other broad leaf species	Salix cupularis	14.5	7.8
51	Other broad leaf species	Sorbus	8.1	7.5
52	Other broad leaf species	Salix cupularis	9.1	8.9
53	Other broad leaf species	Sorbus	16.2	9.4
54	Other broad leaf species	Salix cupularis	9.1	10.4
55	Other broad leaf species	Salix cupularis	7.5	7.5
56	Other broad leaf species	Salix cupularis	9.8	11.2
57	Other broad leaf species	Sorbus	8	8.1
Tree
BCM-1						BCM-2						BCM-3
No.		Tree species	DBH (cm)	H (m)		No.		Tree species	DBH (cm)	H (m)		No.		Tree species	DBH (cm)	H (m)
1		Picea asperata	25.2	12.8		1		Populus davidiana	13.1	12.6		1		Ouercus aliena var. auteserrata	16.3	13.7
2		Picea asperata	5.9	6.8		2		Populus davidiana	14.6	10.1		2		Ouercus aliena var. auteserrata	15.7	13.7
3		Picea asperata	5.8	7.2		3		Populus davidiana	12.9	11		3		Quercus variabilis	14.9	11
4		Picea asperata	14.2	10		4		Populus davidiana	10.5	11.2		4		Ouercus aliena var. auteserrata	16.8	15.1
5		Picea asperata	13.7	13.5		5		Populus davidiana	11.3	11.3		5		Ouercus aliena var. auteserrata	14.7	13.5
6		Picea asperata	35.8	18.5		6		Populus davidiana	12.4	11.3		6		Quercus variabilis	16.9	15.3
7		Ouercus aliena var. auteserrata	12	13		7		Populus davidiana	12.6	10.2		7		Quercus variabilis	15.3	15.5
8		Ouercus aliena var. auteserrata	5.5	7.2		8		Populus davidiana	7.1	11		8		Quercus variabilis	22.4	15.8
9		Quercus variabilis	6.2	7.5		9		Populus davidiana	7.6	11.5		9		Pinus armandii	42.3	18.5
10		Quercus variabilis	14.7	15.1		10		Populus davidiana	14.2	13.2		10		Pinus armandii	41.2	17.1
11		Quercus variabilis	14.3	13.5		11		Populus davidiana	12.1	13		11		Betula albosinensis	8.2	11
12		Ouercus aliena var. auteserrata	6.9	8.1		12		Populus davidiana	21.2	12.7		12		Betula albosinensis	22.3	17.2
13		Quercus variabilis	14.1	14.5		13		Populus davidiana	16.2	9.5		13		Betula albosinensis	18.8	15.6
14		Quercus variabilis	15.1	18.5		14		Populus davidiana	14.6	7		14	Other broad leaf species	Trib. Rhoideae	15.6	15.1
15		Pinus armandii	24.6	15.1		15		Populus davidiana	15.4	12.8		15	Other broad leaf species	Acer davidii	14.5	12.8
16		Pinus armandii	25.3	17.8		16		Populus davidiana	17.3	13.3		16	Other broad leaf species	Litsea pungens	12.4	14.5
17		Betula albosinensis	15.4	15.8		17		Populus davidiana	11.8	13		17	Other broad leaf species	Trib. Rhoideae	23.7	17.1
18		Betula albosinensis	20.3	14.5		18		Populus davidiana	14.5	11		18	Other broad leaf species	Trib. Rhoideae	18.6	16.5
19		Betula albosinensis	6	11.5		19		Populus davidiana	12.5	7.8		19	Other broad leaf species	Trib. Rhoideae	11.1	14
20		Betula albosinensis	6.4	10.4		20		Quercus variabilis	12.9	10.5		20	Other broad leaf species	Trib. Rhoideae	7.2	10.8
21	Other broad leaf species	Corylus heterophylla	21.4	13.7		21		Quercus variabilis	20.8	12		21	Other broad leaf species	Trib. Rhoideae	19.5	17
22	Other broad leaf species	Acer davidii	18.2	12.8		22		Quercus variabilis	24.5	12.3		22	Other broad leaf species	Acer davidii	11.6	10.8
23	Other broad leaf species	Trib. Rhoideae	11.3	12		23		Ouercus aliena var. auteserrata	19.5	13.5		23	Other broad leaf species	Acer davidii	7.2	9.4
24	Other broad leaf species	Trib. Rhoideae	11.7	14.5		24		Ouercus aliena var. auteserrata	25.1	13.8		24	Other broad leaf species	Lindera obtusiloba	15.5	15.1
25	Other broad leaf species	Trib. Rhoideae	10	11		25		Ouercus aliena var. auteserrata	8.5	13		25	Other broad leaf species	Sorbus hupehensis	10.7	12.3
26	Other broad leaf species	Acer davidii	5.6	8.2		26		Ouercus aliena var. auteserrata	19.5	14		26	Other broad leaf species	Lindera obtusiloba	8.4	11.5
27	Other broad leaf species	Acer davidii	24.4	16.2		27		Pinus armandii	11.6	10.8		27	Other broad leaf species	Lindera obtusiloba	8	12.6
28	Other broad leaf species	Cerasus pseudocerasus	6.6	6.8		28		Pinus armandii	10.8	8.5		28	Other broad leaf species	Lindera obtusiloba	6.3	10.3
29	Other broad leaf species	Cerasus pseudocerasus	5.8	6.3		29		Pinus armandii	28.5	14.2		29	Other broad leaf species	Sorbus	20.3	17.1
30	Other broad leaf species	Carpinus turczaninowii	17.5	14		30		Betula albosinensis	30.1	14.2		30	Other broad leaf species	Sorbus hupehensis	7.5	12
31	Other broad leaf species	Acer davidii	6.4	8		31		Betula albosinensis	19.5	13.8		31	Other broad leaf species	Carpinus turczaninowii	7.4	10.8
32	Other broad leaf species	Litsea pungens	5.7	6.8		32		Betula albosinensis	16	11		32	Other broad leaf species	Sorbus hupehensis	5.3	9.7
33	Other broad leaf species	Trib. Rhoideae	17.4	12.6		33	Other broad leaf species	Acer ginnala	8.2	5.2		33	Other broad leaf species	Sorbus hupehensis	13.3	13
34	Other broad leaf species	Carpinus turczaninowii	19.3	15.5		34	Other broad leaf species	Acer mono	16.2	13.8		34	Other broad leaf species	Acer davidii	10.4	9.5
35	Other broad leaf species	Acer davidii	7.1	7.5		35	Other broad leaf species	Acer mono	16.2	13.9		35	Other broad leaf species	Sorbus hupehensis	6.7	8.2
36	Other broad leaf species	Carpinus turczaninowii	16.9	15.1		36	Other broad leaf species	Acer mono	16.6	14		36	Other broad leaf species	Acer davidii	6.1	7.5
37	Other broad leaf species	Carpinus turczaninowii	18.2	15.5		37	Other broad leaf species	Sorbus	17.3	12.8		37	Other broad leaf species	Trib. Rhoideae	22.7	16.2
38	Other broad leaf species	Litsea pungens	6.4	6.8		38	Other broad leaf species	Sorbus	20	12.8		38	Other broad leaf species	Kalopanax	24.2	18.5
39	Other broad leaf species	Acer davidii	8	10.2		39	Other broad leaf species	Acer davidii	9.9	7		39	Other broad leaf species	Sorbus	11.6	13.1
40	Other broad leaf species	Carpinus turczaninowii	12.3	12.5		40	Other broad leaf species	Acer davidii	8.6	5.8		40	Other broad leaf species	Kalopanax	26.7	17.5
41	Other broad leaf species	Carpinus turczaninowii	12.6	13		41	Other broad leaf species	Acer ginnala	8.2	7.8		41	Other broad leaf species	Corylus heterophylla	6.8	7.2
42	Other broad leaf species	Carpinus turczaninowii	8.2	11.5		42	Other broad leaf species	Sorbus	10	5.2		42	Other broad leaf species	Sorbus	25	17.1
43	Other broad leaf species	Acer davidii	15.8	11		43	Other broad leaf species	Salix cupularis	11.3	8.5		43	Other broad leaf species	Trib. Rhoideae	18.6	15.8
44	Other broad leaf species	Acer davidii	9.5	10.8		44	Other broad leaf species	Salix cupularis	24.8	5.5		44	Other broad leaf species	Corylus heterophylla	5.2	8
45	Other broad leaf species	Carpinus turczaninowii	11.6	13.6		45	Other broad leaf species	Sorbus	22.8	12.1		45	Other broad leaf species	Corylus heterophylla	5.3	8.6
46	Other broad leaf species	Trib. Rhoideae	9	10.8		46	Other broad leaf species	Acer mono	7.8	6.5		46	Other broad leaf species	Corylus heterophylla	5.5	8.8
47	Other broad leaf species	Acer davidii	12.4	11.8		47	Other broad leaf species	Sorbus	30.8	13.5		47	Other broad leaf species	Corylus heterophylla	5.7	9
48	Other broad leaf species	Sorbus	8.4	10.6		48	Other broad leaf species	Cerasus pseudocerasus	8.8	8.5		48	Other broad leaf species	Acer davidii	7.3	8.2
49	Other broad leaf species	Carpinus turczaninowii	8.7	13		49	Other broad leaf species	Cerasus pseudocerasus	7.3	7.2		49	Other broad leaf species	Trib. Rhoideae	17.5	12
50	Other broad leaf species	Trib. Rhoideae	8	11.5		50	Other broad leaf species	Acer davidii	9.4	7.5		50	Other broad leaf species	Trib. Rhoideae	16	14.7
51	Other broad leaf species	Litsea pungens	6.8	11.2								51	Other broad leaf species	Acer davidii	12.2	10.8
52	Other broad leaf species	Litsea pungens	12.7	13.2								52	Other broad leaf species	Acer ginnala	5.2	5.1
53	Other broad leaf species	Sorbus	8.9	12.2								53	Other broad leaf species	Acer davidii	11.3	10.5
54	Other broad leaf species	Acer davidii	9	9.5								54	Other broad leaf species	Sorbus	18.5	13.9
												55	Other broad leaf species	Sorbus	8.1	8.5
Tree
CM-1						CM-2						CM-3
No.		Tree species	DBH (cm)	H (m)		No.		Tree species	DBH (cm)	H (m)		No.		Tree species	DBH (cm)	H (m)
1		Picea asperata	17.4	18.8		1		Picea asperata	25.4	20.7		1		Ouercus aliena var. auteserrata	11.8	20.1
2		Ouercus aliena var. auteserrata	8.4	12.7		2		Populus davidiana	15.3	17.6		2		Ouercus aliena var. auteserrata	16.4	20.3
3		Ouercus aliena var. auteserrata	10.9	10.7		3		Ouercus aliena var. auteserrata	10.3	10.5		3		Pinus armandii	11.8	19.4
4		Picea asperata	14.2	15.8		4		Betula albosinensis	20.7	12.3		4		Pinus armandii	27.2	23.3
5		Pinus armandii	11.7	17.4		5		Pinus armandii	20.9	19.2		5		Pinus armandii	22.4	22.5
6		Pinus armandii	24.3	20.4		6		Pinus armandii	10.7	14.6		6		Pinus armandii	25.7	22.7
7		Pinus armandii	24.2	20.2		7		Pinus armandii	20.6	25.9		7		Pinus armandii	17.2	20.2
8		Pinus armandii	27.2	21.5		8		Pinus armandii	20	21.1		8		Pinus armandii	19.4	19.8
9		Pinus armandii	17.4	18.2		9		Pinus armandii	25.4	24.2		9		Pinus armandii	16.4	19.6
10		Pinus armandii	16.8	18.9		10		Pinus armandii	15	24.3		10		Pinus armandii	14.4	19.9
11		Pinus armandii	19.4	20.1		11		Pinus armandii	15.3	23.4		11		Pinus armandii	21.3	21.9
12		Pinus armandii	14.1	18		12		Pinus armandii	24.6	23.5		12		Pinus armandii	20.7	20.6
13		Pinus armandii	18.8	20.5		13		Pinus armandii	10.2	11.3		13		Betula albosinensis	34.5	24.5
14		Pinus armandii	15.1	21.2		14		Pinus armandii	32.2	23.5		14		Betula albosinensis	35.7	23.5
15		Pinus armandii	21.8	23.5		15		Pinus armandii	40.9	24.1		15		Betula albosinensis	17.2	7.3
16		Pinus armandii	10.1	11.2		16		Pinus armandii	15.4	24.1		16	Other broad leaf species	Juglans cathayensis	15.7	15.7
17		Pinus armandii	10.7	18.8		17		Pinus armandii	20.2	24.2		17	Other broad leaf species	Lindera obtusiloba	13.6	21.9
18		Pinus armandii	21.7	21.5		18		Pinus armandii	25.3	24.1		18	Other broad leaf species	Trib. Rhoideae	16.3	18.4
19		Pinus armandii	22.4	21		19		Pinus armandii	30.4	23.2		19	Other broad leaf species	Trib. Rhoideae	20.2	20.2
20		Pinus armandii	33.2	23.5		20		Pinus armandii	19	22		20	Other broad leaf species	Trib. Rhoideae	20	21.3
21		Pinus armandii	11.1	17.2		21		Pinus armandii	14.1	21.1		21	Other broad leaf species	Trib. Rhoideae	16.4	20.4
22	Other broad leaf species	Trib. Rhoideae	19	22.5		22		Pinus armandii	10.5	21.1		22	Other broad leaf species	Trib. Rhoideae	18.5	20.1
23	Other broad leaf species	Trib. Rhoideae	16.2	20.2		23		Pinus armandii	7.2	10.2		23	Other broad leaf species	Trib. Rhoideae	23	20.7
24	Other broad leaf species	Trib. Rhoideae	11	14.4		24		Pinus armandii	13.2	19.1		24	Other broad leaf species	Trib. Rhoideae	19	20.1
25	Other broad leaf species	Sorbus	7.5	12.1		25		Pinus armandii	12.2	16.5		25	Other broad leaf species	Trib. Rhoideae	20.2	19
26	Other broad leaf species	Trib. Rhoideae	23.2	21.5		26	Other broad leaf species	Sorbus	25	23.2		26	Other broad leaf species	Sorbus	21.1	21.5
27	Other broad leaf species	Trib. Rhoideae	22.4	23.5		27	Other broad leaf species	Trib. Rhoideae	12.2	16.6
28	Other broad leaf species	Trib. Rhoideae	19.2	18.3		28	Other broad leaf species	Trib. Rhoideae	20.1	23.3
29	Other broad leaf species	Trib. Rhoideae	21.7	22.3		29	Other broad leaf species	Trib. Rhoideae	18.1	17.8
30	Other broad leaf species	Trib. Rhoideae	14.6	15.2		30	Other broad leaf species	Carpinus turczaninowii	27.8	19.5
31	Other broad leaf species	Trib. Rhoideae	21.8	20.3
32	Other broad leaf species	Trib. Rhoideae	22.3	21.5
33	Other broad leaf species	Trib. Rhoideae	20.8	19.8
34	Other broad leaf species	Trib. Rhoideae	14.4	18.9
35	Other broad leaf species	Trib. Rhoideae	19.2	20.5
36	Other broad leaf species	Trib. Rhoideae	17.6	18
37	Other broad leaf species	Trib. Rhoideae	22.1	23
38	Other broad leaf species	Trib. Rhoideae	22.2	23.2
	Shrub-dominant species								Herb-dominant species
	BM		BCM		CM				BM		BCM		CM
	Schisandra sphenanthera		Schisandra sphenanthera		Viburnum betulifolium				Matteuccia intermedia		Tripterospermum chinense		Athyrium sinense
	Viburnum betulifolium		Smilax china		Lonicera fragrantissima				Lysimachia christinae		Viola verecunda		Tripterospermum chinense
	Rubus mesogaeus		Viburnum betulifolium		Rubus mesogaeus				Carex duriuscula		Carex duriuscula		Carex duriuscula

## Sheet: Characteristics of  plots
Foret types	Altitude (m)	Slope aspect	Slope position	Slope gradient (°)	DBH(cm)	Height(m)	Density(n/ha)
BM	2121	Northwest	Central	24	13.74	10.6	1425
BM	1984	Northwest	Central	19	18.61	10.65	650
BM	1975	Northwest	Central	16.3	19.38	11.3	725
BCM	2075	Northeast	Central	20	12.58	11.87	1350
BCM	2039	Northeast	Central	13	15.07	10.85	1275
BCM	2009	Northeast	Central	11	14.3	12.8	1375
CM	1899	Northwest	Below	15.3	18.06	19.11	950
CM	1897	Northwest	Below	16	19.27	20.07	750
CM	1928	Northwest	Below	22	19.85	20.19	650

## Sheet: Biomass
Tree biomass							Shrub biomass					Herb biomass				Litter biomass
Foret types	Stem(t/ha)	Branch(t/ha)	Leaf(t/ha)	Bark(t/ha)	Root(t/ha)		Foret types	Leaf(t/ha)	Root(t/ha)	Branch(t/ha)		Foret types	Aboveground(t/ha)	Underground(t/ha)		Foret types	Biomass(t/ha)
BM	59.5474	44.9347	6.47998	9.17128	30.8376		BM	0.7878	1.7004	0.4718		BM	0.350667	0.5824		BM	4.18744
BM	50.8822	61.345	4.07355	7.62847	33.504		BM	0.676	1.958	0.9664		BM	0.18448	0.55384		BM	3.28408
BM	75.3978	70.7626	5.56628	8.41717	44.8038		BM	0.597	1.9775	0.766		BM	0.194	0.5109		BM	4.1
BCM	58.4098	25.5902	6.16161	7.71499	23.598		BCM	0.8438	1.2668	0.9752		BCM	0.35184	0.68888		BCM	4.43891
BCM	64.8755	33.7143	4.99429	8.6774	29.8574		BCM	1.8962	1.6992	1.0116		BCM	0.42224	0.74168		BCM	4.22699
BCM	94.3682	44.6603	9.48454	10.8098	36.048		BCM	1.052	1.8306	1.8792		BCM	0.19872	0.54376		BCM	3.945
CM	93.9104	36.8542	7.98819	9.88328	29.9084		CM	0.38	1.2	0.32		CM	0.4792	1.183		CM	5.55509
CM	81.5036	30.162	7.73781	9.33966	25.1874		CM	0.45	1.5	0.35		CM	0.546	1.2029		CM	5.11569
CM	75.7923	40.5422	5.96825	9.33241	28.7841		CM	0.33	1.8	0.45		CM	0.3566	0.8525		CM	5.89

## Sheet: Plant nutrient concentrations
Note:	LC: leaf carbon concentration, BC: branch carbon concentration,SC: stem carbon concentration, TB: bark carbon concentration,RC: root carbon concentration
	LN:leaf nitrogen concentration, BN: branch nitrogen concentration,SN: stem nitrogen concentration, TBN: bark nitrogen concentration, RN: root nitrogen concentration
	LP:leaf phosphorus concentration, BP: branch phosphorus concentration, SP: stem phosphorus concentration, TBP: bark phosphorus concentration, RP: root phosphorus concentration
Tree	GC: litter carbon concentration, GN: litter nitrogen concentration, GP: litter phosphorus concentration
Foret types	LC(g/kg)	BC(g/kg)	SC(g/kg)	TBC(g/kg)	RC(g/kg)	LN(g/kg)	BN(g/kg)	SN(g/kg)	TBN(g/kg)	RN(g/kg)	LP(g/kg)	BP(g/kg)	SP(g/kg)	TBP(g/kg)	RP(g/kg)
BM	414.082	443.167	482.408	490.57	450.1	18.09	5.60667	2.43333	2.08	3.23333	2.37	1.33	0.56	0.94	1.46
BM	431.389	442.701	352.15	491.59	435.89	17.7733	7.00333	1.50333	2.25	3.25333	3.07667	1.28333	0.635	0.956667	0.843333
BM	477.51	351.16	422.34	466.47	404.2	19.6033	4.64333	2.25333	2.32	3.3	2.27	1.19667	0.606667	0.813333	1.11333
BCM	487.353	462.22	467.86	498.107	491.841	15.08	6.48667	0.95	1.52	2.84	1.35333	0.986667	0.49	1.02	0.913333
BCM	506.08	522.08	503.77	493.07	490.614	15.3567	5.19333	0.941667	1.73	3.12667	1.76333	1.03	0.75	0.783333	0.893333
BCM	443.824	466.8	469.17	507.82	452.375	16.9133	4.97667	2.16167	2.22	3.65667	1.8	1.31333	0.535	0.786667	1.07667
CM	522.388	519.211	485.239	501.565	489.793	14.0853	5.64733	0.98	1.2	2.10667	1.41033	0.618667	0.35	0.343333	0.843667
CM	541.529	491.616	511.173	529.589	481.241	11.2127	5.4	1.1	1.35	2.02333	1.394	0.797	0.3	0.456333	0.737333
CM	534.187	552.332	519.124	555.037	476.436	12.3203	5.26367	1.2	1.6	2	1.347	0.701333	0.273333	0.36	1.01333
Shrub
Foret types	LC(g/kg)	BC(g/kg)	RC(g/kg)	LN(g/kg)	BN(g/kg)	RN(g/kg)	LP(g/kg)	BP(g/kg)	RP(g/kg)
BM	454.022	539.888	401.504	18.6967	9.40667	9.05667	2.10333	1.63	1.88667
BM	438.888	442.259	394.77	14.9867	8.19667	7.47	1.90667	1.28667	1.36333
BM	442.34	487.56	432.62	17.9	9.12	8.72	2.02	1.67	1.7
BCM	468.756	447.014	412.22	15.6233	7.32	7.61333	1.42	1.47667	1.61333
BCM	446.505	424.985	463.885	15.5867	6.99667	7.24	1.62	1.3	1.34667
BCM	427.672	503.371	433.924	20.17	6.66	9.48	1.92	1.57	1.80333
CM	393.444	494.201	460.772	20.12	7.69667	9.15667	2.61	2.04667	1.84
CM	427.136	501.411	442.524	18.77	6.7	8.32	2.2	1.87	1.42
CM	390.444	481.338	432.017	17.28	6.25	9.01	2.32	1.56	1.64
Herb
Foret types	LC(g/kg)	RC(g/kg)	LN(g/kg)	RN(g/kg)	LP(g/kg)	RP(g/kg)
BM	411.79	397.414	19.73	9.56667	2.83	2.39667
BM	435.351	405.6	16.3133	11.6533	2.87	2.02
BM	420	401	20.1	10.89	2.85	2.34
BCM	426.682	391.179	15.5767	8.42667	1.73333	1.57333
BCM	433.117	388.789	18.8033	11.56	2.02	1.59333
BCM	457.247	417.926	21.42	11.4933	2.94	1.86333
CM	393.163	382.065	20.6267	10.4	3.11333	1.99
CM	406.54	360.21	17.7167	8.34	2.55333	1.71
CM	422.74	442.06	20.42	11.86	2.83	1.67
G-litter
Foret types	GC(g/kg)	GN(g/kg)	GP(g/kg)
BM	468.995	18.0667	1.79333
BM	449.583	18.3333	1.77
BM	355.4	18.34	1.77
BCM	425.636	14.9933	1.37
BCM	463.073	14.5133	1.39333
BCM	410.192	18.09	1.55667
CM	452.05	14	1.41
CM	441.56	13.53	1.39
CM	480.97	14.4	1.42

## Sheet: Soil
Note:	BD: bulk density, SOC: soil organic carbon, TN: soil total nitrogen, TP: soil total phosphorus
Soil
Forest types	Layer	BD(g/cm3)	SOC(g/kg)	TN(g/kg)	TP(g/kg)
BM	0-20cm	1.09143	29.7969	3.00465	0.934144
BM	20-40cm	1.3536	10.6112	1.03729	0.60083
BM	40-60cm	1.38143	8.41308	0.782362	0.631133
BM	0-20cm	1.14203	36.1055	3.21102	0.972624
BM	20-40cm	1.2246	14.828	1.63492	0.907308
BM	40-60cm	1.47263	13.0078	1.33744	0.750066
BM	0-20cm	1.11417	25.2918	2.47211	0.957561
BM	20-40cm	1.55673	11.4383	1.03037	0.771176
BM	40-60cm	1.50843	7.97651	0.784506	0.650007
BCM	0-20cm	0.957033	26.1382	2.47448	0.590404
BCM	20-40cm	1.4442	10.054	0.837765	0.440594
BCM	40-60cm	1.50073	5.6895	0.527953	0.469117
BCM	0-20cm	1.50857	25.397	2.30496	0.496086
BCM	20-40cm	1.51673	7.77779	0.703459	0.371657
BCM	40-60cm	1.47753	6.60223	0.636784	0.327448
BCM	0-20cm	1.23533	31.7035	2.92302	0.854013
BCM	20-40cm	1.51247	18.3847	1.6213	0.663022
BCM	40-60cm	1.47497	15.962	1.57223	0.686369
CM	0-20cm	1.2302	19.0392	1.61759	0.614172
CM	20-40cm	1.21923	8.54704	0.718393	0.411267
CM	40-60cm	1.47117	9.80034	0.932389	0.491253
CM	0-20cm	1.45433	15.5113	1.42081	0.738396
CM	20-40cm	1.5184	7.15517	0.64326	0.465403
CM	40-60cm	1.45473	5.42289	0.472057	0.513407
CM	0-20cm	1.3734	19.9352	1.80495	0.744176
CM	20-40cm	1.56133	5.78981	0.500443	0.377775
CM	40-60cm	1.5939	5.21858	0.452692	0.260104
